# Supplementary material
Source: PubMed Central journal article supplement (PMC6938146)
Supplement: rccm.201906-1113OC_monticelli_data_supplement.pdf [file rccm.201906-1113OC_monticelli_data_supplement.pdf]

# **Lung Innate Lymphoid Cell Composition is Altered in Primary Graft Dysfunction**

Laurel A Monticelli, Joshua M Diamond, Steven A Saenz,  
Elia D Tait Wojno, Mary K Porteous, Edward Cantu,  
David Artis, Jason D Christie

Online Data Supplement

**Online Data Supplement Figure E1: Flowchart of lung transplant patient enrollment for allograft sample collection**

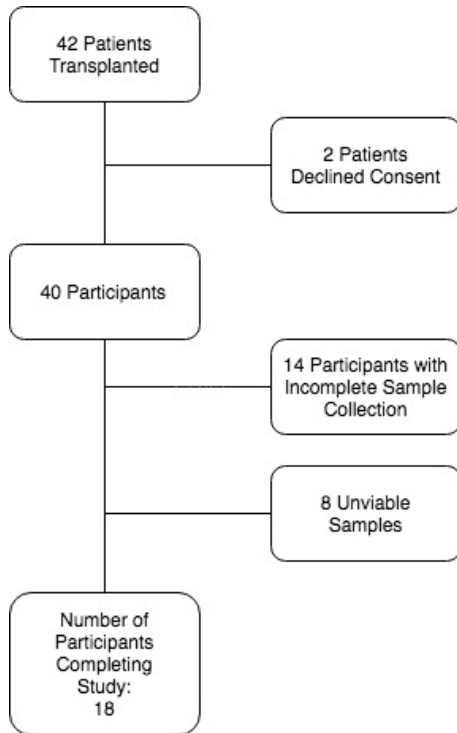

**Online Data Supplement Figure E2: Gating strategy for ILC identification.**

Representative flow cytometric plots of live CD45<sup>+</sup> cells (A) and live CD45<sup>-</sup> cells (B) in a lung allograft.

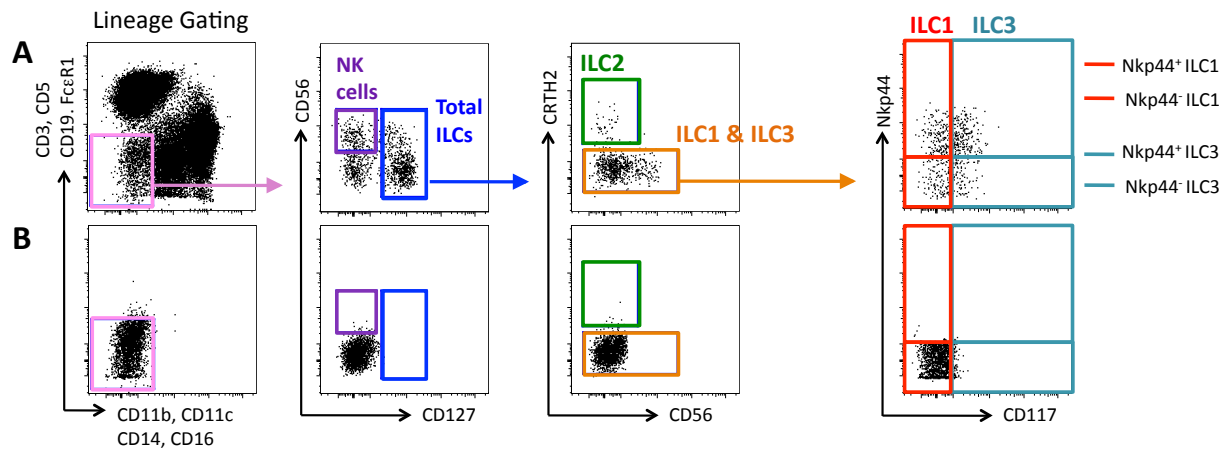

**Online Data Supplement Table E1: Lung transplant donor characteristics**

| <b>Donor Characteristic</b>       | <b>PGD (n=8)</b> | <b>Non-PGD (n=10)</b> | <b>p-value</b> |
|-----------------------------------|------------------|-----------------------|----------------|
| Female Gender, n (%)              | 3 (37.5)         | 4 (40)                | 0.9            |
| Donor Smoking History, yes, n (%) | 5 (66.7)         | 7 (70)                | 0.7            |
| Donor Alcohol History, yes, n (%) | 4 (50)           | 6 (60)                | 0.7            |
| Highest Donor PaO2 (mmHg)         | 435.5            | 495                   | 0.4            |
| Lowest Donor PaO2 (mmHg)          | 270              | 224                   | 0.7            |
| Donor Days on Ventilator          | 2.5              | 3                     | 0.8            |
| Oxygen Challenge PaO2 (mmHg)      | 453              | 430.7                 | 0.2            |
